# Supplementary material
Source: MDPI journal article supplement (https://www.mdpi.com/2311-7524/10/2/168)
Supplement: s1 [file s1]

Archive with 2 entries (2 files):
- SupplementalMaterial 1.pdf
- Supplementary Material 2.pdf
