# Supplementary material
Source: MDPI journal article supplement (https://www.mdpi.com/2311-7524/10/2/168)
Supplement: s1 [file s1]

# Increasing Concentrations of *Arthrospira maxima* Sonicated Biomass Yields Enhanced Growth in Basil (*Ocimum basilicum*, Lamiaceae) Seedlings

Camila Andrea Marín-Marín <sup>1,\*</sup>, José Alberto Estrada-Peláez <sup>1</sup>, Juan Martín Delgado Naranjo <sup>2</sup> and Paola Andrea Zapata Ocampo <sup>1</sup>

<sup>1</sup> ICIF Research Group, Faculty of Science and Biotechnology, CES University, Medellín 050021, Colombia; estrada.jose@uces.edu.co (J.A.E.-P.); pazapata@ces.edu.co (P.A.Z.O.)

<sup>2</sup> Bioprocess Research Group, Department of Chemical Engineering, Faculty of Engineering, Universidad de Antioquia, Medellín 050010, Colombia; martin.delgado@udea.edu.co

\* Correspondence: marinm.camila@uces.edu.co

## Supplemental Material 2

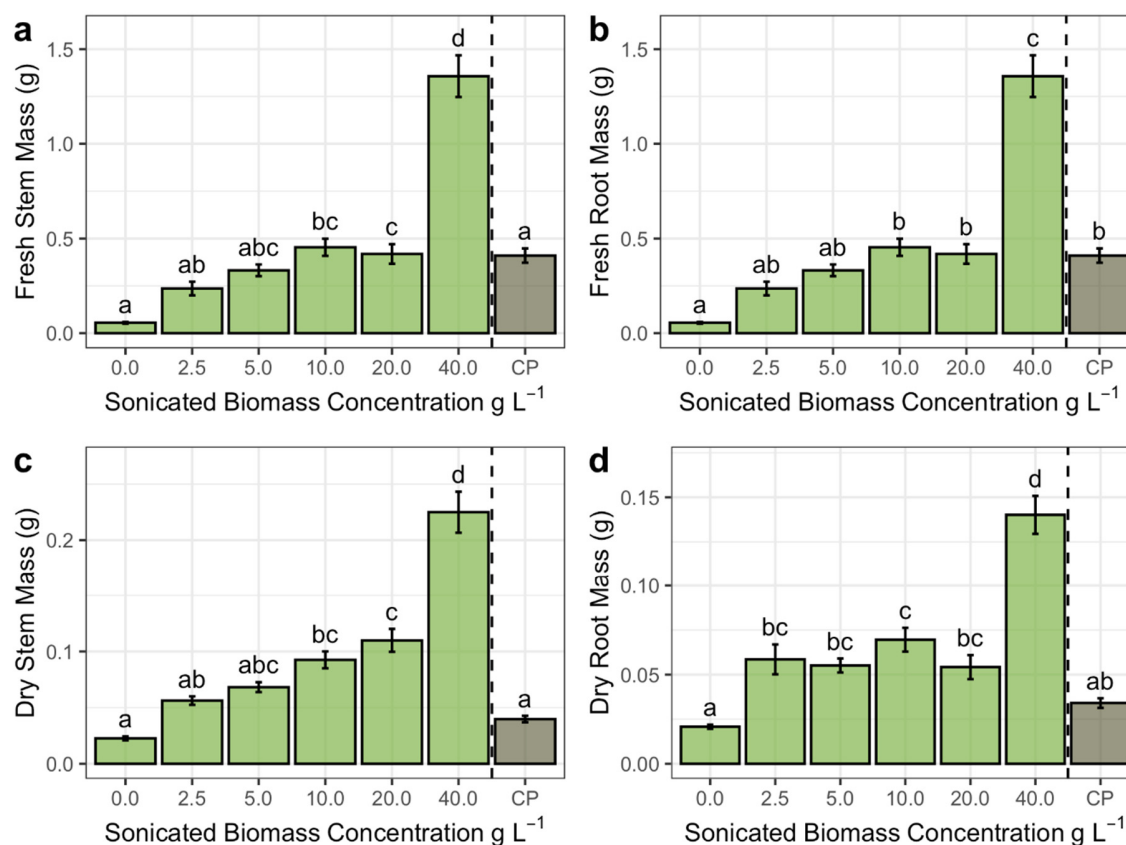

**Figure S4.** Mean (a) fresh stem mass, (b) fresh root mass, (c) dry stem mass, and (d) dry root mass in response to *A. maxima* sonicated biomass concentrations. The commercial product (CP) refers to Optimar® at recommended dose of 4 mL L<sup>-1</sup>. Error bars represent standard error. Different letters above error bars, represent statistically significant differences (p < 0.05)
